1 **A qualitative evaluation of a multi-modal cancer prehabilitation programme for colorectal, head and neck and**  
2 **lung cancers patients**

3

4 **Authorship**

5 Sharon Linsey Bingham,<sup>1</sup> Dr Sarah Small,<sup>2</sup> Dr Cherith Jane Semple<sup>1,2\*</sup>

6

7 **Affiliations**

8

9 <sup>1</sup>Institute of Nursing and Health Research, School of Nursing, Ulster University, Belfast, Northern Ireland

10 <sup>3</sup> Cancer Services, South Eastern Health and Social Care Trust

11

12 **\*Corresponding author**

13 Email: [cherith.semple@setrust.hscni.net](mailto:cherith.semple@setrust.hscni.net) (CJS)

14

15 SLB collected data and drafted manuscript

16 CJS and SS reviewed transcripts and analysis

17 All authors reviewed the manuscript

18

## 19 Abstract

### 20 *Background*

21 Growing evidence indicates patients' survivorship  
22 outcomes can be enhanced through active engagement in  
23 a multi-modal cancer prehabilitation programme (MCP),  
24 although this intervention is not uniformly embedded as a  
25 standard of care. MCP aims to optimise patients  
26 physiologically and psychologically for cancer treatments,  
27 shorten recovery time, reduce complications, promote  
28 healthier lifestyles and improve quality of life. South  
29 Eastern Health and Social Care Trust (SEH) developed and  
30 evaluated a system-wide collaborative approach to  
31 MMCP across three tumour groups (colorectal, lung, head  
32 and neck cancer). Addressing the lack of qualitative  
33 evaluation of MCPs, this paper explores mechanisms promoting feasibility and acceptability of MCP from  
34 patients' and interdisciplinary professionals' perspectives.

#### **Key elements required to deliver a successful multimodal cancer prehabilitation programme**

- Necessity of visionary, strategic leadership
- Committed interdisciplinary stakeholders to include patient and public involvement
- Skilled, trained multi-disciplinary multi-sectoral team to deliver programme
- Screening of patients to tailor referrals to multimodal elements
- Effective and efficient referral processes
- Patient-centred pathways, delivered across universal, targeted and specialist stepped-care model based on patient's needs
- Promote tailored intense exercise prescriptions
- Data collection parameters agreed and implemented to enable robust evaluation
- Effective and regular communication with professionals operationally delivering the programme
- Sustainable funding

### 35 *Methods*

36 Semi-structured virtual one-to-one interviews were conducted with 24 interdisciplinary professionals and nine  
37 patients. Transcripts were recorded, transcribed verbatim and themes developed using Framework Analysis.

### 38 *Results*

39 Analysis of findings identified four themes providing an in-depth understanding of key elements required to  
40 develop and deliver a MCP: 1) Planning: Building the team, 2) Shared vision to develop and tailor the MCP to  
41 meet patient needs, 3) Delivering the MCP and 4) Moving forward - improving the MCP.

### 42 *Conclusion*

43 The system-wide collaborative approach to developing a MCP at SEH was deemed both feasible and acceptable.  
44 Success was attributed to visionary leadership, alongside a diverse group of interdisciplinary professionals being  
45 engaged, motivated and committed to improving patient outcomes. Iterative, responsive troubleshooting  
46 during delivery facilitated successful implementation. Greater adherence to provision of prescriptive high  
47 intensity exercise within the programme may further promote enhanced patient outcomes.

48

## 49 **Background**

50 Despite advancements in cancer treatment, 15–40% of patients with cancer who undergo surgical treatment  
51 experience postoperative complications [1]. As a result, patients may experience increased hospital stays or  
52 hospital readmissions, with negative impacts to physical functioning, psychosocial outcomes and overall quality  
53 of life [2]. Macmillan Cancer Support and the Royal College of Anaesthetists suggest that cancer prehabilitation  
54 should underpin the whole cancer pathway [3]. Taking forward this guidance, the Cancer Strategy for NI 2022-  
55 2032 [4] proposes that cancer prehabilitation should be available to all those who will benefit. Despite this  
56 recommendation and the growing body of evidence, cancer prehabilitation is currently not embedded as a  
57 standard of care within cancer care pathways locally, nationally or internationally [5]. This is due to a myriad of  
58 reasons, including workforce shortages, funding, lack of evidence around best practice models and need for  
59 addition information on cost-effectiveness [5-7].

60

61 Multi-modal cancer prehabilitation (MCP) aims to optimise physical and psychological health through delivery  
62 of a series of tailored interventions including exercise, nutrition, and psychological support alongside behaviour  
63 change support for alcohol consumption and smoking [8], from the time of cancer diagnosis to the beginning of  
64 acute treatment. Most supporting evidence for MCP is provided for the following tumour groups, colorectal  
65 (CRC), lung and head and neck (HN) [1,9-11]. Studies evaluating the efficacy of MCP have discovered patient  
66 benefits even when implemented for just two weeks prior to treatment [12]. Patient benefits can include  
67 improved physiological function and resilience, shorter recovery time, reductions to peri-operative  
68 complications, gaining a sense of control over uncertainties ensued from a cancer diagnosis, improving quality  
69 of life and positive impacts on long-term health through behaviour change [12-13]. While people regain more  
70 control over their own health, the NHS and other healthcare systems have the potential to make economic  
71 savings [6].

72

73 A cancer unit within South Eastern Health and Social Care Trust (SET), United Kingdom, systematically planned,  
74 developed, implemented and evaluated a MCP across CRC, lung and HN tumour groups during the COVID-19  
75 pandemic with no additional funding [14]. The SET MCP is a personalised and tailored MCP, with referral  
76 pathways for individual's based on screening using validated measures. The intervention focuses upon  
77 functional, emotional and nutritional needs aligned to patients' tumour group and current lifestyle habits  
78 (smoking and alcohol) using the universal-targeted-specialised conceptual framework endorsed by Macmillan

79 Cancer Support, the Royal College of Anaesthetists and National Institute for Health Research Cancer and  
80 Nutrition Collaboration [15] (see Fig 1). The universal and targeted exercise pathway aimed to have patients  
81 completing 3 high intensity training (HIIT) sessions per week, and the specialist pathway involved a  
82 physiotherapist-led bespoke cardiovascular and strengthening session per week with prescribed home exercise  
83 for alternate days. Universal emotional support was provided by Macmillan Move More Co-ordinators (MMCs)  
84 who had Level 4 Personal Training alongside generalist emotional support training; with targeted and specialist  
85 pathways delivered by counsellors /assistant or clinical psychologist respectively. Similarly, universal nutritional  
86 advice was provided by MMCs, with targeted and specialist input by dietetic support worker or dietitian.  
87 Smoking cessation support was provided when necessary, taking a motivational interviewing approach and  
88 providing advice on pharmacotherapies. Substance misuse liaison provided alcohol advice, education, and  
89 signposting to referral services for patient as indicated. The purpose of the MCPP was to improve patient  
90 function prior to treatment and optimise health and wellbeing [14]. From an organisational perspective the  
91 MCPP at SET sought to develop and harness collaborative interdisciplinary working across a range of partners,  
92 promote good practice, foster shared learning, inform restructuring of services, scale-up and roll-out of similar  
93 programmes. Given the complexity of SET's MCPP [14] which comprised of interplay between interdisciplinary  
94 roles across a multi-sectoral team being planned and implemented in a real-world environment, qualitative  
95 methods were deemed appropriate for evaluation. This would enable an enhanced understanding of processes  
96 and mechanisms leading to MCPP's success and failure, paramount prior to scaling up and further roll-out [16].  
97 To date, the authors are aware of only one MCPP qualitative feasibility study, however the focus was solely upon  
98 delivery fidelity and acceptability [17]. This novel paper aims to explore mechanisms promoting feasibility and  
99 acceptability of a MCPP from patients' and professionals' perspectives exploring planning, development and  
100 implementation phases. The objectives were to gain understanding of mechanisms that:

- 101 1) promoted and informed planning and development of MCPP
- 102 2) promoted delivery of a personalised and tailored MCPP from patients' and professionals'  
103 perspectives
- 104 3) promoted acceptability and feasibility of MCPP implementation in a real-life context from patients'  
105 and professionals' perspectives.

106

107 *Fig 1. Stepped care framework for prehabilitation intervention [5].*

108

109 **Method**

110 *Study design*

111 The overarching theoretical framework used was qualitative descriptive design [18], employing semi-structured  
112 interviews to explore interdisciplinary professional and patients' perspectives of the MCPP.

113

114 *Sample and recruitment*

115 A purposeful sample of 30 eligible interdisciplinary professionals across pivotal roles, involved in the planning,  
116 development, screening or delivery of MCPP was selected. See Table 1 for inclusion criteria. The professional  
117 sample included representation from medical, clinical nurse specialist (CNS), allied health professionals (AHPs),  
118 Move More Co-ordinators (MMCs) and administration roles within SET, local councils and Macmillan Cancer  
119 Support. To ascertain interest in participation, potential interdisciplinary professionals received an email from  
120 the Principal Investigator (CJS), with study invite, participant information sheet and consent form. The second  
121 participant study population was patients, who were purposefully selected to maximise variation in terms of  
122 gender, engagement (drop-outs and completers) and tumour group (CRC=10, Lung=5, HN=5) and contacted via  
123 email or telephone by a CNS who acted as the Local Collaborator. These potential participants were also  
124 provided with a study invite, participant information sheet and consent form. Participants corresponded  
125 directly with SLB, a post-doctoral researcher external to SET, known to two professionals and unknown to all  
126 patients, to ask questions and confirm consent. All participants were recruited to the study between February  
127 and May 2022. Ethical approval for the study was granted by Ulster University Nursing and Health Research  
128 Filter Committee.

129

130 *Table 1. Inclusion / Exclusion criteria for semi-structured interviews.*

|                                        | <b>Inclusion criteria</b>                                                                                                                                                                                                                                                                                        | <b>Exclusion criteria</b>                                                                                                                                                                                    |
|----------------------------------------|------------------------------------------------------------------------------------------------------------------------------------------------------------------------------------------------------------------------------------------------------------------------------------------------------------------|--------------------------------------------------------------------------------------------------------------------------------------------------------------------------------------------------------------|
| <b>Interdisciplinary professionals</b> | <ul style="list-style-type: none"><li>• Registered healthcare professionals (HPs) (CNS, AHP, medical staff), MMCs, health development and health informatic personnel directly involved in the development, screening, referral, or delivery of MCPP at SET</li><li>• Able to provide informed consent</li></ul> | <ul style="list-style-type: none"><li>• Those meeting inclusion criteria but on leave during data collection period</li><li>• Healthcare students</li></ul>                                                  |
| <b>Patients</b>                        | <ul style="list-style-type: none"><li>• Age &gt;18 years old</li><li>• Diagnosis of CRC, lung or HN cancer</li><li>• Referred to SET MCPP</li><li>• Able to provide informed consent</li><li>• Communicate in English</li></ul>                                                                                  | <ul style="list-style-type: none"><li>• Patients deemed too unwell by relevant CNS at time of data collection</li><li>• Receiving end-of-life treatment</li><li>• Dementia or cognitive impairment</li></ul> |

131

132 **Data collection**

133 To facilitate exploration of feasibility and acceptability, the Theoretical Framework of Acceptability (TFA) [19]  
134 and the Normalising Process Theory (NPT) [20] guided the development of topic guides used with each study  
135 population. The TFA is a multi-faceted framework to guide the assessment of acceptability based on anticipated,  
136 experiential, cognitive and emotional responses to the intervention, including constructs of affective attitude,  
137 burden, coherence, perceived effectiveness and self-efficacy. The NPT comprises of four components which  
138 seek to understand what individuals and groups do to enable an intervention to be normalised. These  
139 components are: 1) coherence (sense-making), 2) cognitive participation (engagement), 3) collective action  
140 (work to enable intervention to happen) and 4) reflexive monitoring (formal and informal appraisal of the  
141 benefits and costs of the intervention). Furthermore, topic guides developed were informed by literature and  
142 knowledge from subject experts and piloted prior to data collection. Semi-structured interviews were  
143 conducted by SLB using a virtual platform or telephone. Interviews were recorded and transcribed verbatim by  
144 either SLB or professional transcriber. Average interview duration was 28 minutes and 15 minutes for  
145 professionals and patients respectively. Quotes included in the evaluation had repeated words and unnecessary  
146 colloquial phrases e.g. “you know” removed, and the interviewer added detail within [ ] to improve coherence.

147

148 **Data Analysis**

149 Transcripts were checked for validity (SLB) and read by all authors. Transcripts were coded by SLB in NVivo V12,  
150 with CJS independently coding four transcripts to enhance study rigour. Transcripts were analysed using  
151 Framework Analysis [21] and informed by the aforementioned theories (TFA and NPT). Framework analysis sits  
152 outside any epistemological perspective providing the researcher team flexibility in analysis, while providing a  
153 method to account for perspectives from a diverse group of participants [21]. Data from first 10 interviews  
154 were coded inductively and subsequent transcripts were deductively coded, in line with evaluation objectives.  
155 Initial inductive codes were developed and collated by the first and last author (SLB), and through team  
156 discussion initial themes identified. Through iterative team discussions (CJS, SS, SLB) the themes were refined,  
157 and final themes were established to ensure the correct meaning of the participants had been captured.

158 **Results**

159 Participating interdisciplinary professionals (n=24) (n=6 no response) represented a range of disciplines, tumour  
160 groups, and sectors (see Table 2) and 9 patients represented 3 tumour groups with 11 declining participation as  
161 outlined in Table 3.

162 **Table 2. Demographics of interdisciplinary professionals.**

|  | N (%) |
|--|-------|
|--|-------|

| <b>Interdisciplinary roles</b>                                                            |         |
|-------------------------------------------------------------------------------------------|---------|
| Registered Nurse (includes CNSs, (n=5)<br>Smoking Cessation (n=1), Alcohol Liaison (n=1)) | 7 (30)  |
| Doctor                                                                                    | 3 (12)  |
| Speech and Language Therapist                                                             | 1 (4)   |
| Physiotherapist                                                                           | 2 (9)   |
| Dietitian                                                                                 | 1 (4)   |
| MMC                                                                                       | 3 (12)  |
| Assistant psychologist                                                                    | 1 (4)   |
| Emotional wellbeing support                                                               | 1 (4)   |
| Strategic partners (excludes n=1 CNS/strategic role)                                      | 5 (21)  |
|                                                                                           |         |
| <b>Gender</b>                                                                             |         |
| Male                                                                                      | 5 (21)  |
| Female                                                                                    | 19 (79) |
|                                                                                           |         |
| <b>Attended specific prehab training in advance of SET MCPP</b>                           |         |
| Yes                                                                                       | 3 (12)  |
| No                                                                                        | 21 (88) |
|                                                                                           |         |
| <b>Tumour specialism (n=15)</b>                                                           |         |
| Lung                                                                                      | 2 (13)  |
| CRC                                                                                       | 5 (33)  |
| HN                                                                                        | 3 (20)  |
| HPs working across tumour groups                                                          | 5 (33)  |

163

164 **Table 3. Patient demographics (n=9).**

|                                                     | <b>N (%)</b> |                                                 | <b>N (%)</b> |
|-----------------------------------------------------|--------------|-------------------------------------------------|--------------|
| <b>Engagement with evaluation (n=20 approached)</b> |              | <b>Support Network</b>                          |              |
| Accepted                                            | 9 (45)       | Very good                                       | 8 (89)       |
| Approached - No response                            | 6 (30)       | Poor                                            | 1 (11)       |
| Initially interested – Withdrew, unknown reason     | 3 (15)       |                                                 |              |
| Declined - No recollection of MCPP                  | 1 (5)        | <b>Educational status</b>                       |              |
| Declined – Unwell                                   | 1 (5)        | Secondary school                                | 5 (56)       |
|                                                     |              | Third level education                           | 4 (44)       |
|                                                     |              |                                                 |              |
| <b>Tumour group</b>                                 |              |                                                 |              |
| HNC                                                 | 2 (22)       | <b>Frequency of exercise prior to diagnosis</b> |              |
| Lung                                                | 4 (45)       | Regular                                         | 6 (67)       |
| CRC                                                 | 3 (33)       | Somewhat active                                 | 2 (22)       |
|                                                     |              | Never                                           | 1 (11)       |
|                                                     |              |                                                 |              |
| <b>Age</b>                                          |              |                                                 |              |
| 46-60                                               | 2 (22)       | <b>Access to video platform</b>                 |              |
| 61-75                                               | 6 (67)       | Yes                                             | 8 (89)       |
| 76+                                                 | 1 (11)       | No                                              | 1 (11)       |
|                                                     |              |                                                 |              |
|                                                     |              | <b>Comfort using video platform</b>             |              |
| <b>Gender</b>                                       |              |                                                 |              |
| Male                                                | 6 (67)       | Very confident                                  | 4 (44)       |
| Female                                              | 3 (33)       | Fairly confident                                | 1 (11)       |
|                                                     |              | Not confident                                   | 4 (44)       |
|                                                     |              |                                                 |              |
| <b>Marital status</b>                               |              | <b>How was the MCPP delivered?</b>              |              |
| Living alone                                        | 1 (11)       | Telephone                                       | 3 (33)       |
| Married/Living with partner                         | 7 (78)       | Virtual and telephone                           | 3 (33)       |
| Living with family member/ friend                   | 1 (11)       | In-person                                       | 4 (44)       |
|                                                     |              |                                                 |              |
| <b>Time from Diagnosis</b>                          |              |                                                 |              |
| 1-2 months                                          | 1 (11)       |                                                 |              |
| 6-12 months                                         | 7 (78)       |                                                 |              |
| 12 months +                                         | 1 (11)       |                                                 |              |

165

166 Four themes were identified from professional and patient data, 1) Planning: Building the team, 2) A shared  
167 vision that led to successful development of MCPP: the important elements, 3) Delivering the MCPP: in action  
168 and 4) Moving forward - improving the MCPP.

169

### 170 **3.1 Theme 1: Planning: Building the team**

171 Having clearly established the purpose of the team, namely to plan, develop, deliver and evaluate a MCPP at SET  
172 there was a need to build a diverse interdisciplinary team to enable delivery of the tailored MCPP across the  
173 agreed stepped-care conceptual framework. Attributable characteristics for professionals was enthusiasm and  
174 motivation, with strategic and clinical champion roles. The vision and energy for programme delivery was clear  
175 from the outset.

176 *"It's great that we're able to pilot it here in the SE Trust ... there was a study in Manchester, ... the*  
177 *research and the data that's come out of that, its proven to be a really, good way of getting*  
178 *patients back up on their feet. So, it's brilliant."* P17 (Emotional support)

179

180  
181 Key to the successful engagement of HPs was their previous knowledge of Enhanced Recovery After Surgery  
182 and the growing evidence-base for cancer prehabilitation. Furthermore, what appeared important for HP  
183 engagement was team leadership with credible expert clinical experience and inspiring and motivating  
184 leadership style. P18 (Smoking Cessation) stated,

185 *"To be fair, [Strategic clinical programme lead] can motivate people and get people around the*  
186 *table and do that's kind of exactly what made such a difference."*

187

188 Collective, positive 'can do' attitudes towards the MCPP pilot programme were key to exploring the potential of  
189 and progressing the MCPP within current resources during COVID-19, with P22 (Pelvic Physiotherapist)  
190 reporting,

191 *"I sort of went in, you know, very open minded, I really wasn't really sure what this was going to*  
192 *entail."*

193

194 Overwhelmingly professionals viewed MCPP as a worthwhile intervention with reports of how MCPP was "a "no-  
195 brainer" (P20 strategic). Anticipated benefits and motivating factors for professionals was the desire that MCPP  
196 could improve patient outcomes, alongside formalising pathways for care delivery and reduced costs. P1 (CNS  
197 HNC) highlighted MCPP as an

198 *"Opportunity to give some control back to the patient ... and is a prime opportunity to enable and*  
199 *engage people early in a shared care model of their treatment."*

200



201 Professionals' knowledge and prior experience of MCPP varied; some with more limited knowledge, while others  
202 were well-informed through conference attendance and abreast of published research. MMCs, while qualified  
203 in their field, lacked experience supporting patients at diagnosis. P2 (MMC) reported,

204 *"Traditionally, with Move More, we would have seen those [patients] sort of post-treatment,*  
205 *probably in treatment and post-treatment, post-treatment would have been our biggest."*  
206

207 This lack of experience did impact upon confidence when engaging with patients early in the treatment  
208 trajectory, identifying a need for training and practice supervision.

209

### 210 *3.2 Theme 2: A shared vision that led to successful development of MCPP: the important elements*

211 Reporting on the early development of the MCPP through to implementation, this theme encompassed  
212 three subthemes which highlight elements related to [1] Developing the MCPP, [2] Person-centredness  
213 and [3] Attention to professionals' training needs.

#### 214 *[1] Developing the MCPP*

215 With a shared vision, the strategic steering group organised five timebound (3 weeks) Task and Finish groups  
216 incorporating views of subject matter experts on exercise, nutrition, emotional support, data management and  
217 evaluation. Assisted by experts in Performance Management an electronic referral process was developed  
218 which along with screening tools, pathways and outcome measures was *"all explained in the Standard Operating*  
219 *Procedure"* [P24 MMC]. Furthermore, contributing to a foundation of trust and formalising governance  
220 structures, data sharing agreements were established between SET and local council partner organisations along  
221 with secure channels for sharing patient information.

222 Interdisciplinary professionals collaborated to select robust, validated, appropriate and easy to use screening  
223 and assessment tools to inform the patient's tailored referral pathway and enable evaluation of the MCPP.  
224 Selection was achieved through a consensus approach with the team seeking to strike a balance between *"the*  
225 *usability and the time burden and practicality element of things."* (P5 Strategic). Further adaptations to outcome  
226 measures were required in response to COVID-19 restrictions; the 6-minute walk test was substituted for a 30  
227 sec sit-to-stand test with similar efficacy to facilitate remote assessment.

#### 228 *[2] Person-centred approach to delivery*

229 The screening process enabled a personalised and tailored prehabilitation programme for patients, making the  
230 MCPP a vital component of the cancer care continuum. HN cancer services piloted a 'One-stop Prehab clinic'  
231 whereby patients, following diagnosis and on completion of staging scans, had a scheduled appointment to meet  
232 with a CNS and AHPs including SLT and dietetics in central dedicated clinical space, reducing appointments for

233 patients and enhancing communication regarding patient need between specialities. The CNS, dietetic and SLT  
234 perceived advantages to this approach, as patients could move easily between HPs and HPs could ensure co-  
235 ordinated provision of informed care from diagnosis throughout treatment trajectory. P19(SLT) described,

236 *“We had a clinic a Monday afternoon ... usually, CNS saw them first, and then speech therapy*  
237 *next, and then dieticians ... logistically, it was a good way of working ... we had the benefit of CNS*  
238 *... [who] could give us any updated information...so it was really helpful.”*

239 Unfortunately, the SLT reported that due to workforce pressures their discipline is not currently represented at  
240 this ‘One-stop Prehab clinic’ for patients with HN cancer but indicated a keen willingness and desire to re-  
241 establish this clinical commitment when adequate funding was available to support service delivery.

### 242 ***[3] Attention to professionals’ training needs***

243 Many of the HPs reported feeling adequately equipped for their role in the MCPP with transferrable skills, with  
244 some finding informal direction on specific issues as sufficient. For others, development of the Standard  
245 Operating Procedures manual helped to equip them to deliver the MCPP. Some AHPs who did not routinely  
246 work within cancer care, reported their delivery of a multi-modal element within the MCPP was more  
247 challenging, recommending a need for specific training for team members from a non-cancer background. More  
248 often, this was gaining knowledge on best practice when communicating with patients who have received a  
249 potentially life-limiting diagnosis, whilst for others this was related to disease-specific clinical information.

250 *“I really didn’t have very much knowledge about even the surgery that is involved with cancers, so*  
251 *a big learning curve, really, for myself.”* (P22 Pelvic Physiotherapist)

252  
253 MMC’s received formal training from Macmillan Cancer Support on “Managing difficult conversations” and  
254 “Motivational Interviewing” (P24 MMC). Furthermore, MMCs were also able to access training provided by SET  
255 subject experts covering areas like ‘Healthy eating – nutrition’, ‘Smoking cessation’, ‘Alcohol and You’, exercises  
256 to promote “core stability” for patients with CRC cancers and “head, neck and shoulder exercises” for patients  
257 with HN cancers (P1 CNS HNC). MMCs were also provided with training relating to collecting data using  
258 functional and patient-reported outcome measures. When issues hindering implementation of the MCPP across  
259 disciplines were identified, further appropriate and timely training was offered to enhance fidelity of the  
260 intervention in accordance with the ‘Standard Operating Procedure’ manual. Training was flexible and aligned  
261 to need of professional, with personnel providing training considered as “extremely approachable and  
262 contactable” (P21 CNS HNC).

263

264 **3.3 Delivering the MCPP: in action** (within this theme are patients and professionals experiences of the MCPP).

265 Selection of patients for MCPP was based on predetermined inclusion and exclusion criteria, which included  
266 tumour staging and a range of physiological parameters. However, it would appear that some CNSs across the  
267 three tumour groups, were selecting patients who they perceived would benefit most and considered to be  
268 motivated and engaged, raising the possibility of HPs acting as gatekeepers to the programme.

269

270 HPs (mainly CNS and consultants) staged communication with patients and family members regarding MCPP,  
271 with initial conversations succinctly introducing the topic, presenting a brief outline of programme components  
272 and benefits with their written patient resource pack. Subsequent conversations with other professionals  
273 delivering elements of the programme provided more detail to reduce information burden at diagnosis.

274 *"I think probably at diagnosis the patient can be overwhelmed with what has been told. But [we*  
275 *tell them], we're sending home the resource pack and saying, 'Look don't focus too much about*  
276 *that, just at the moment, you will get a phone call, and it'll be all explained better at that time.'"*  
277 (P21 HNC CNS)  
278

279 Most patients offered MCPP were interested although HP presence may have added bias. Patients regarded  
280 MCPP as a credible approach with Patient 7 describing the MCPP as *"it's a no brainer,"* a descriptive phrase  
281 similarly used by professionals. Patients believed that participation in the MCPP would enhance physical  
282 preparedness for surgery, aid post-treatment recovery and inform future care. Patients described reassurance,  
283 comfort and connectedness to the healthcare team knowing there would be support from the outset of their  
284 cancer trajectory.

285 *"When you get your diagnosis of cancer, you sit there and you get this diagnosis that you spend*  
286 *your entire life, hoping you never do... you just think your world has ended, you know, and being*  
287 *reached out to by somebody who is saying, no. You know, we're going to we can stay positive*  
288 *through this. We can stay moving, we can keep in touch, you can stay moving... And I found that*  
289 *even that alone, the reach out, somebody's reaching out and saying, no, no, come on, XXXX*  
290 *[Patient name] we're going to do this."* (Patient 1 Lung)  
291

292 Patients who did opt in to the MCPP, were reported by HPs to engage well and thankful for the specialist input  
293 early on in their treatment journey. When there was resistance, HPs perceived this to be due to patients feeling  
294 overwhelmed, the patient's perceived lack of need for such an intervention and resistance to behaviour change.

295 Screening tools and the online referral form were largely viewed positively however the Distress Thermometer  
296 was identified as problematic given the baseline distress at cancer diagnosis, but its inclusion agreed important  
297 as described by P4 (CNS CRC).

298 *"The Distress Thermometer was barely an accurate one, because they [patients] are so extremely*  
299 *anxious...so if it is ridiculously high ... they need referred for the Associate Psychologist, you know,*  
300 *for that other than that universal emotional pathway, so I think it's by no means an accurate*  
301 *measurement but I suppose it still has to be a baseline."*

302

303 Electronic screening and the online referral process employed for SET MCPP were viewed favourably.  
304 Completion of one online form per patient, enabling referral to different pathways within the conceptual  
305 multimodal stepped-care framework, was deemed highly acceptable and advantageous. This approach was  
306 keenly driven to avoid “*the copious referrals sometimes necessitated when assessing new patients*” (P1 CNS HNC  
307 Strategic) whilst enabling a tailored MCPP approach. P1 (CNS HNC Strategic) describes this as,

308 *“A referral form ... to just tick and select the components with the prehabilitation and personalise*  
309 *that and with one submit button automatic referrals would generate to the relevant people, so that*  
310 *was my vision so thankfully we’ve been able to action that which is one of the great wins in the*  
311 *system that we do have today”*

312 This online form was easy to complete and use by CNSs, although technical issues were identified. That said,  
313 early implementation was hampered by incomplete forms with P21 (CRC CNS) reporting “*I don't think I realised*  
314 *the importance of filling in every single detail,*” although rectified by prompts.

315

316 Delivery of MCPP was enhanced by well-structured and action orientation meetings, which supported effective  
317 team working and created an environment of mutual respect and shared learning. Meetings facilitated  
318 interdisciplinary working, enhanced understanding of clinical and non-clinical roles, interdisciplinary learning  
319 and real-time troubleshoot.

320 *“My work [is] not cancer focused. I was meeting other professionals that I've never ever had been*  
321 *dealing with and involvement with Health Development [Team] ...also the Councils and Macmillan*  
322 *... so that I just felt it was fabulous, the way everybody worked together... I just felt that the working*  
323 *together and the troubleshooting and the problem solving was great.”* (P14 Physiotherapist)  
324

325 Information received through electronic referral was reported as largely sufficient, however, when necessary,  
326 patient’s Electronic Care Records (ECR) were accessed and reported as a useful bolster. For some HPs, they had  
327 a desire for clearer information on patient’s treatment and prognosis to inform care.

328 *“I think sometimes that's maybe a bit unfair on the patient of us turning up, you know, because if*  
329 *somebody is basically going to be dead in two months, I mean, is it really appropriate to start*  
330 *going on at them about their alcohol use if it's been a big crutch in their life.”* (P6 Alcohol Liaison)  
331

332 The Alcohol Liaison and Smoking Cessation Services, reported processes were akin to already developed  
333 approaches within HNC, however patient interest in engaging with these services varied, as P18 pointed out,

334 *“Obviously, if somebody is going through a cancer diagnosis, that they can be anxious, they can*  
335 *be agitated. And that's always reasons for them to carry on smoking. So, it's a bit of a challenge.”*  
336 P18 (Smoking Cessation)  
337

338 Nonetheless, referrals to the MCPP were considered as appropriate with most professionals having capacity  
339 within their role to deliver MCPP. MMCs placed most emphasis on the exercise component seeking to ensure

340 that exercise prescription fitted with patient's individual need, capability, motivation and routine. However, at  
341 a strategic level there was some concern that the exercise prescription by MMC was being viewed "*in its loosest*  
342 *form*" (P12 MMC), with reduced credence on HIIT. Effort to address this was initiated through further booster  
343 training session with MMCs. This appeared to have limited impact with MMCs believing interventions like HIIT  
344 to be unrealistic for a number of patients referred to the MCPP. On the other hand, patients viewed the exercise  
345 programme positively; reflecting on its varied, patient-centred and achievable attributes, including indoor and  
346 outdoor options which Patient 6 (Lung) reporting that "*it helped me get out of the house too.*" MMCs were  
347 trained to provide nutritional advice and emotional support under universal pathway; however, findings  
348 highlighted that MMCs focused less on these elements attributed to perceptions that this was not the MMC's  
349 main area of expertise.

350 *"I wouldn't say it's [nutritional advice provision] very in depth on any level, you know what we're*  
351 *not nutritionally trained and I suppose like any physical activity coordinator, somebody comes*  
352 *looking nutritional in-depth advice, you know, we refer them on because that's not our forte, we're*  
353 *not trained in that, but we do have basic knowledge and understanding."* (P2 MMC)  
354  
355

356 Patients demonstrated positive perceptions of the MCPP, being equipped with adequate information,  
357 highlighting the information pack was comprehensive and allowed them to digest the information at home.  
358 Furthermore, patients reported feeling informed about their treatment, having an increased confidence because  
359 of the MCPP support, and emotionally supported at what was a difficult time as described by Patient 4 (Lung)  
360 "*[If] you were having a bad day, just being in their company would give you a boost.*"

361  
362 Patients also highlighted benefits to fitness, reducing or quitting smoking and alcohol, and a sense their  
363 treatment outcomes benefited as a result, Patient 6 (Lung) highlighted their biggest benefit,

364 *"Well, it was it was the exercises that the nurse was doing with me...You know all in all it seemed*  
365 *dead simple...You can get help whenever you want. There's just so simple, but the difference it was*  
366 *unbelievable... he [Surgeon] said my fitness was fine to do surgery."*

367  
368 Of note, family members supported and saw value in the MCPP, with the reflection that patients received  
369 additional support during the pandemic when they were often isolated. Patient 8 (HNC) reported,

370 *"I was talking to my, my daughter in law, who, unfortunately has terminal cancer and has been*  
371 *living with us for a few years now...she said it was nice, that I was able to talk to these people [MCPP*  
372 *professionals], have the support and know exactly what was ahead ... she didn't have that facility.*  
373

374 There was a great sense of patient gratitude for the MCPP, with patients impressed by professionals'  
375 commitment and availability to communicate with patients between appointments. Patient 4 (Lung)  
376 commented,

377 *"I think it's something that will benefit patients and the Health Service both. I thought it was*  
378 *well-managed, well-run, and just [want to] say thank you."*  
379

380

### 381 **3.4 Moving forward – improving the MCPP**

382 This theme will be presented as three subthemes as professionals and patients reported a series of [1] barriers  
383 and [2] facilitators linked to the implementation of the MCPP at SET and made several suggested important [3]  
384 improvements moving forward.

#### 385 ***Subtheme [1]: Barriers to implementing MCPP***

386 Overarching challenges to MCPP implementation related to the timing of the intervention, its delivery timeframe  
387 and the impact of COVID-19 restrictions on in-person contact. MCPP was most often introduced at diagnosis,  
388 while necessary to maximise prehabilitation timeframe, HPs reported that patients were often feeling  
389 overwhelmed with little capacity to process further information. The often-short timeframe between diagnosis  
390 and treatment was challenging for MMCs who reported that patients had to sort personal affairs; but delivery  
391 was further impacted by COVID-19 guidance on isolation. P5 (Strategic) described,

392 *"We've had to adapt with the [COVID-19] guidance, you know, the patients are obviously being*  
393 *swabbed and at different stages, you know, so if you think about a pathway, a patient's been*  
394 *screened, they've been referred, they might have the time one [data collection], but then they're*  
395 *getting swabbed and told right your operations next week, but you have to isolate for 72 hours*  
396 *before your operation, you know, so it's adjustments within the COVID guidance at the time to*  
397 *keep them on a green pathway for their treatment."*  
398

399 Spurious theatre lists during COVID-19 often meant that patients were provided with limited notice for date of  
400 surgery, with MMCs having less time than anticipated for MCPP and inability to capture Time 2 functional and  
401 patient-reported outcome measures (post-MCPP and before commencement of cancer treatment). Striking a  
402 balance between data collection and intervention delivery was often difficult, with MMCs advocating for a longer  
403 programme delivery timeframe (at least 2-weeks) to ensure optimal data collection and delivery of multimodal  
404 components.

405

406 Virtual communication approaches used for working group meetings, on one hand facilitated attendance at  
407 meetings, but for some inhibited interaction. MMCs were somewhat resistant to virtual approaches to service  
408 delivery, although recognised virtual platforms as a safer method to telephone contact when collecting  
409 functional data collection, particularly for the 30-second Sit-to Stand test. Variation in COVID-19 restrictions for  
410 local councils meant delivery mode of MCPP differed across the four local council areas, reflective of varied  
411 MMCs' employment and governance structures. For some MMCs there was no in-person visits during the

412 pandemic due to their local council guidance, for others, garden visits were permitted, making not only the  
413 development of a therapeutic relationship easier, but enhanced collection of functional measures such as Grip  
414 Test. Rapport building for the delivery of targeted emotional support was also thought to be hampered by  
415 virtual communication methods, as P10 (Assistant Psychologist) reported,

416 *"She [the patient] mentioned a few times how frustrated she was with not being able to meet*  
417 *somebody face to face. You know, have that part, that connection, I suppose."*

418  
419 However, in-person contact was not welcomed by all patients as P5 (Strategic) described,

420 *"Patients are being told to isolate, they're worried about it jeopardising their surgical*  
421 *treatment, you know, they didn't want to go to leisure centres or see people they don't need to*  
422 *see."* (P5 Strategic)

423  
424  
425 Despite these professional reported challenges, most patients did not experience barriers to the MCPP due to  
426 mode of intervention delivery. Although cognisant of COVID-19 restrictions, more often patients indicated a  
427 preference for in-person contact, and when unavailable one patient highlighted his unease with online  
428 platforms. Patient 3 (HNC) described,

429 *"I'm not a fan of video and zoom calls. So, if I could have got either a telephone conversation or*  
430 *face to face, I was much happier."*

431

## 432 ***Subtheme [2]: Facilitators for the MCPP***

433 The collaborative effort by a team of interdisciplinary, multi-sectoral enthusiastic and committed professionals  
434 facilitated the implementation of MCPP in SET. Key drivers to its successful implementation were visionary  
435 leadership, shared vision and commitment of professionals throughout the MCPP planning, development and  
436 implementation phases, which enabled MCPP to become increasingly embedded into an integrated pathway.  
437 Effective communication between skilled, committed professionals and patients contributed to MCPP success.  
438 Patient 4 reported,

439 *"[LUNG CNS] and the team did encourage me but not in a pressured way. It was very much*  
440 *voluntary. I didn't feel obliged. My family were very supportive. So that all seemed to be entirely*  
441 *sensible, and a good thing to do."*

442

443 As MCPP processes were increasingly embedded into HPs' practice, the perceived time burden for screening and  
444 referral by the CNSs was reduced, as P4 (CNS CRC) reflected,

445 *"I guess it was just really with practice, that we got into the habit of getting all the correct*  
446 *information. So, it did take a wee while initially, a lot of information wasn't being teased out."*

447

448 In addition, timely and interval communication on dissemination outputs and sharing outcome-based  
449 accountability reporting cards kept interdisciplinary professionals abreast of progress and facilitated ongoing  
450 commitment.

451

452 COVID-19 restrictions, while creating barriers provided unique opportunities. For example, the Health  
453 Development team had unexpected time capacity to opportunistically develop elements of MCPP at SET, which  
454 resulted in better co-ordination across tumour groups and services.

455 *“So, I think for us to have gone ahead and gone on our own. It might have worked, it might not,*  
456 *but it would have been much more difficult. This is a much, much better model.”* (P13  
457 Physiotherapist)

458  
459 Furthermore, changes to service delivery as a result of COVID-19 has left a legacy of a hybrid MCPP delivery  
460 model, deemed as helpful by some patients, in creating flexibility and reducing travel time to appointments.  
461 Also, inclusion of family members or partners was perceived to support patient engagement, particularly when  
462 patients relied on them for transport to appointments. P12 (MMC) described,

463 *“So, you know, maybe somebody's saying, ‘Oh, I don't drive, but my husband might be able to bring*  
464 *me in’, [and I would reply] well sure, he can come and take part in or he can do this, or he can do*  
465 *that.”*  
466

467 Some professionals reported skill development as a consequence of being engaged in the process, such as  
468 working with patients with cancer, project management, collaborative multisectoral working, promoting job  
469 satisfaction from contributing to positive patient outcomes. Those involved in the MCPP reported an increased  
470 sense of value in their work, with satisfaction sharing project progress with other healthcare Trusts and  
471 Department of Health. P8 (Dietetic) reflected,

472 *“I think you definitely feel like it's another sort of element to the dietetic role that it's because you*  
473 *are part of the MDT [multidisciplinary team] and part of the project, it's a lot more, you feel very*  
474 *valued I suppose and your input very beneficial.”*  
475

### 476 ***Subtheme [3]: Improving MCPP***

477 To aid an enhanced and sustained MPCC at SET there are several key priorities areas worth noting. Recurrent  
478 funding was the most pressing reported priority, thus enabling a sustained model of funding for interdisciplinary  
479 roles to take forward MCPP as P3 (Strategic) reported *“I think sometimes we underestimated the amount of time*  
480 *and expertise required to really shape and drive the project forward”*. Funding is required to create equitable  
481 services across trust boundaries, as geographical limitations to services prevented patients referred from other  
482 Health and Social Care Trusts (HSCTs) to elements of the MCPP. Funding should include provision for project  
483 management, professionals' roles including MMCs, AHP specialities, data management personnel and account  
484 for project scale-up (incorporating further tumour groups), while taking account for staff leave.

485



486 Effective communication and service level agreements between professional groups were also considered as  
487 paramount, aiding clarity to reporting structures particularly when working across organisations. Due attention  
488 is required when introducing new personnel into established yet novel systems, necessitating careful induction.  
489 P10 (Assistant Psychologist) reported, “So, I didn't even know it existed....I didn't even know what cancer prehab  
490 was.” Regular attendance at meetings was key with P1 (CNS HNC) describing,

491 *“Having those continued and sustained on a regular basis and for me is never make assumptions*  
492 *that those delivering a service are actually delivering.”* (P1 CNS HNC)

493  
494 Furthermore, timely communication with MMCs relating to patient treatment schedules could improve  
495 collection of Time 2 data and intervention tailoring. A review of the data collection timepoints and a renewed  
496 consensus agreement on achievable expectations may prove helpful and improve data capture.

497 Flexible training with booster sessions was welcomed and is required on an ongoing basis to promote  
498 intervention fidelity and equip new personnel. To enhance this, developing role competencies for MCPP could  
499 help to identify training needs. Consequently, this would outline expectations for MMCs regarding universal  
500 nutritional advice and importance of exercise prescription, potentially promoting greater patient benefits. P5  
501 (Strategic) identified that,

502 *“[MMCs] need to be prescriptive ... patients do need to be pushed outside their comfort zone ...*  
503 *a lot of it [current provision of MCPP] is self-directed, ...they're [patients] still kept in their*  
504 *comfort zone of what they're happy to do, you know, walking twice a week, or whatever it is.”*  
505 (P5 Strategic)

506  
507

508 Lastly, the development of a bespoke IT system, which is patient-centric to enable seamless screening, referral  
509 and assessment would, while costly, be advantageous by reducing reliance on Performance Management role  
510 co-ordinating data collection across three assessment points, reducing professional burden and system error.

511

512 For the patient, MCPP could be improved through feedback mechanisms when using remote delivery of universal  
513 elements of the services, reassuring patients that exercises were undertaken correctly. Finally, the opportunity  
514 to hear about a previous patient's experience was regarded as a beneficial when used in other parts of care, with  
515 patients reporting it as “one of the best things that happened” and “very reassuring” when they felt “scared stiff”  
516 (Patient 3 HNC). Patients recommended that this should be adopted as part of the MCPP.

517

#### 518 4. Discussion

519 This qualitative evaluation provided an enhanced understanding of mechanisms leading to the feasibility and  
520 acceptability of the MCPP in SET; in conjunction with important attributes that could be changed or adopted to  
521 augment scaling up of the intervention. Despite the COVID pandemic backdrop, interdisciplinary collaboration  
522 across multisectoral organisations forged ahead without funding, maximising upon innovation and creativity to  
523 integrate pathways for a MCPP, striving for better cancer patient-outcomes at SET. Success was mainly due to  
524 the visionary leadership and diverse and committed group of interdisciplinary professionals working together to  
525 adapt and refine a tailored stepped-care MCPP for local implementation at a Cancer Unit in Northern Ireland  
526 [14]. Current research investigating the feasibility and acceptability of MCPPs from the perspectives of  
527 professionals and patients is exceptionally limited [17] with studies often referring to patient recruitment and  
528 participation as indicators of success [23-24]. The findings from this study extend current evidence by illustrating  
529 the mechanisms of success and challenges experienced by those at SET and will be discussed through the lens  
530 of NPT components [20], coherence, cognitive participation, collective action and reflexive monitoring.

531

532 High levels of *coherence* were evident across interdisciplinary groups. Professionals were clear on how MCPP  
533 could complement and be a vital part of the cancer care continuum. Key facilitators, such as having knowledge  
534 that MCPP can positively impact patients' functional and emotional outcomes, along with reducing the economic  
535 burden of patient care upon the healthcare budget [5,25-26] has promoted successful implementation of MCPP.  
536 Of note, for some, greater coherence could be facilitated through an enhanced appraisal of the recent growing  
537 body of literature surrounding the efficacy of MCPP. For example, some doctors in this study were less aware  
538 of the multifaceted components of the programme and known benefits, even within a short timeframe of less  
539 than two weeks [27]. Rectifying this is important as patients, both within this study and elsewhere articulate  
540 that doctors' communication on the topic influences their uptake and engagement with MCPP [22]. High  
541 coherence can enhance patient recruitment and adherence [28]. Patients who understood the purpose and  
542 benefits of the programme were more committed to the programme, with the converse also evident. High  
543 coherence in the short time-period between cancer diagnosis and treatment commencing can be challenging to  
544 achieve given levels of diagnosis-related stress patients experience at the time of introduction to the MCPP, thus  
545 an evident need for professionals to be skilled in communication, facilitation and providing emotional support  
546 [29].

547

548 The MCPP at SET successfully engaged a varied and committed skilled workforce across tumour groups including  
549 those with strategic, clinical and physical activity knowledge and skills, reflecting good cognitive participation  
550 [19]. Partnering, through established links, with local councils and community and voluntary sector was  
551 advantageous as there was already established a sense of trustworthiness. Similar partnership arrangements  
552 were also reported as a key to success when Greater Manchester adopted a system-wide approach to MCPP  
553 [30]. Involvement from key professionals early in programme development and in an on-going manner was  
554 crucial to success, alongside ensuring that decision-making occurs in a collaborative and shared manner [22].  
555 Cross-sectoral collaborations, however, can be challenging given differing reporting and funding structures [31].  
556 This was somewhat the case for MMCs during the MCPP, which could be addressed by closer participative  
557 working with local council employers. One notable perspective less visible during the development phase of the  
558 MCPP was that of the patient. Best practice [32-33] states it is essential to involve end-users of the intervention  
559 throughout development to ensure that the intervention is acceptable, engaging and feasible, anticipating the  
560 needs of others, as often this not effective. Representative and proactive patient involvement may effectively  
561 address some of the difficulties with coherence mentioned above [25].

562

563 Collective action is characterised by how people work together to achieve outcomes, build confidence and  
564 organisational support [34]. Collaboration between engaged and envisioned professionals was integral to the  
565 development, implementation and ultimately the success of this programme. Each discipline had clear roles  
566 throughout development and implementation, reporting back on progress at working group meetings. Active  
567 participation throughout development and implementation contributed to a sense of self-efficacy, with  
568 professionals highlighting personal progress working with patients with a cancer diagnosis, screening and  
569 outcome tools. Complex interventions delivered in complex systems [35] require high intervention fidelity to  
570 accurately determine the impact of the intervention under study [36]. Delivery of the SET MCPP exercise  
571 component was critiqued by some HPs at a strategic level as requiring more specific and intensive exercise  
572 prescription, despite the agreed exercise doses outlined in the MCPP Standard Operating Procedure manual.  
573 Murdoch *et al.* [17] study of their MCPP with a CRC patient group suggested that while professionals emphasised  
574 that fitness was important for surgery outcomes, patients were not encouraged to increase activity levels.  
575 Herein, they noted that the lack of exercise prescription was attributed to a short timeframe between diagnosis  
576 and treatment, plus constrained resources with clinicians being too busy [17]. In contrast, the SET MCPP  
577 universal and targeted exercise prescription was delivered by MMCs within the local council setting who had  
578 capacity to deliver the programme components, yet exercise prescription was still considered to be lacking HIIT.

579 Future MCPP outcomes may benefit from additional training, monitoring of intervention delivery, and ensuring  
580 professionals integrate skills taught to enhance intervention fidelity [37]. It would be important that any  
581 quantitative evaluation focusing on objective functional and patient-reported outcome measures from the SET  
582 MCPP are understood in terms of the current perceived fidelity to the programme components.

583

584 *Reflexive monitoring* was evident throughout the SET MCPP with monthly working group meetings providing a  
585 vehicle to review progress and facilitate troubleshooting. Analysis, real-time feedback and booster training  
586 sessions allowed many issues to be addressed, however, some outcome data capture remained problematic.  
587 Given the often-short timeframe for MCPP delivery, alongside lack of knowledge of, or changeable, treatment  
588 commencement dates presented as challenges for MMCs to collect Time 2 data. Minimising attrition rates of  
589 Time 2 data capture is paramount to enhance the evidence base for MCPP [26]. Development and  
590 implementation of the MCPP at SET received no additional funding, however a sustained funding model is  
591 required to further consolidate, scale-up and integrate pathways for system-wide implementation.  
592 Professionals in this study, like that of others [26,38] recognised the need for dedicated funding which extends  
593 to sustaining AHP involvement [26], project management and performance data support [38]. Given the success  
594 of MCPP already evident [28], there is now a need to align funding to ensure equitable access of MCPPs to all  
595 cancer patients. The NPT components [20] has been useful to illuminate the mechanisms of feasibility and  
596 acceptability alongside key areas for refinement of the MCPP to maximise future implementation and to identify  
597 important considerations for others seeking to embark on implementation of a MCPP.

#### 598 *Strengths & limitations*

599 This study benefited from an exploration of a diverse range of patient and professionals' perspectives. However,  
600 the Local Collaborations (CNSs) were potentially more likely to enrol patients considered as engagers onto MCPP  
601 and therefore this patient study sample may not be representative of a generic cancer population. During  
602 recruitment to this qualitative evaluation effort was directed in trying to engage patients who dropped out of  
603 MCPP, but this proved challenging depicted in the patient recruitment rate of less than 50%. It is possible that  
604 patients participating in this study are likely to have a positive bias towards MCPP. Further investigation is  
605 required to determine the barriers to participation.

606

#### 607 **Conclusions**

608 The MCPP at SET was deemed a feasible and acceptable tailored and personalised intervention; with visionary  
609 leadership, engaged and motivated interdisciplinary professionals, committed to improved patient outcomes

610 being central to its success. Iterative, responsive troubleshooting throughout implementation contributed to  
611 embedding individualised elements of a MCPP. The MCPP could benefit from greater prescription of HIIT to  
612 maximise potential patient outcomes. Improved professional and patient knowledge of the benefits of MPCC  
613 could maximise referrals to MCPP and enhance patient outcomes.

614

615

## 616 References

- 617 1. Hughes MJ, Hackney RJ, Lamb PJ, et al. Prehabilitation before major abdominal surgery: a systematic  
618 review and meta-analysis. *World J Surg* 2019;43: 1661e8. [https://doi.org/10.1007/s00268-019-04950-  
620 y](https://doi.org/10.1007/s00268-019-04950-<br/>619 y)
- 621 2. Durrand, J., Singh, S. J., and Danjoux, G. Prehabilitation. *Clin.Med. (Lond)*. 2019; 19, 458–464.1.  
622 <https://doi.org/10.7861/clinmed.2019-0257>
- 623 3. Giles C, Cummins S. Prehabilitation before cancer treatment. *BMJ*. 2019; Aug 14;366.  
624 <https://doi.org/10.1136/bmj.l5120>
- 625 4. Department of Health A cancer strategy for Northern Ireland 2022 – 2032. 2022; Belfast: Department  
626 of Health. <https://www.health-ni.gov.uk/publications/cancer-strategy-northern-ireland-2022-2032>
- 627 5. Moore J, Merchant Z, Rowlinson K, McEwan K, Evison M, Faulkner G, Sultan J, McPhee JS, Steele J.  
628 Implementing a system-wide cancer prehabilitation programme: the journey of greater Manchester's  
629 'Prehab4cancer'. *European Journal of Surgical Oncology*. 2021; 1;47(3):524-32.  
630 <https://doi.org/10.1016/j.ejso.2020.04.042>
- 631 6. Silver JK, Baima J. Cancer prehabilitation: an opportunity to decrease treatment-related morbidity,  
632 increase cancer treatment options, and improve physical and psychological health outcomes. *American  
633 Journal of Physical Medicine and Rehabilitation* 2013; 92: 715–27.  
634 <https://doi.org/10.1097/PHM.0b013e31829b4afe>
- 635 7. Macleod M, Steele RJ, O'Carroll RE, Wells M, Campbell A, Sugden JA, Rodger J, Stead M, McKell J,  
636 Anderson AS. Feasibility study to assess the delivery of a lifestyle intervention (TreatWELL) for patients  
637 with colorectal cancer undergoing potentially curative treatment. *BMJ open*. 2018; Jun 1;8(6):e021117.  
638 <https://doi.org/10.1136/bmjopen-2017-021117>
- 639 8. Grimmert C, Bradbury K, Dalton SO, Fecher-Jones I, Hoedjes M, Varkonyi-Sepp J, Short CE. The role of  
640 behavioral science in personalized multimodal prehabilitation in cancer. *Frontiers in Psychology*.  
641 2021:261.
- 642 9. West MA, Loughney Lythogoe D, et al. Effect of prehabilitation on objectively measured physical fitness  
643 after neoadjuvant treatment in preoperative rectal cancer patients: a blinded interventional pilot study.  
644 *Br J Anaesth* 2014;114(2):244e51. <https://doi.org/10.1007/s40140-017-0245-2>
- 645 10. Vagvolgyi A, Rozgonyi Z, Kerti M, et al. Effectiveness of pulmonary rehabilitation and correlations in  
646 between functional parameters, extent of thoracic surgery and severity of post-operative complications:  
647 randomised clinical trial. *J Thorac Dis* 2018;10(6):3519e31. <https://doi.org/10.21037/jtd.2017.05.49>
- 648 11. Vermillion SA, James A, Dorrell RD, et al. Preoperative exercise therapy for gastrointestinal cancer  
649 patients: a systematic review. *Syst Rev* 2018;7:103. <https://doi.org/10.1186/s13643-018-0771-0>
- 650 12. Faithfull S, Turner L, Poole K, Joy M, Manders R, Weprin J, Winters-Stone K, Saxton J. Prehabilitation for  
651 adults diagnosed with cancer: A systematic review of long-term physical function, nutrition and  
652 patient-reported outcomes. *European journal of cancer care*. 2019 Jul;28(4):e13023.  
653 <https://doi.org/10.1111/ecc.13023>
- 654 13. van Rooijen S, Carli F, Dalton S, Thomas G, Bojesen R, Le Guen M, Barizien N, Awasthi R, Minnella E,  
655 Beijer S, Martínez-Palli G. Multimodal prehabilitation in colorectal cancer patients to improve functional  
656 capacity and reduce postoperative complications: the first international randomized controlled trial for  
657 multimodal prehabilitation. *BMC cancer*. 2019 Dec;19(1):1-1. [https://doi.org/10.1186/s12885-018-  
659 5232-6](https://doi.org/10.1186/s12885-018-<br/>658 5232-6)
- 660 14. Small S, Bingham SL. and Semple C. 2022 (In press)
- 661 15. Macmillan Cancer Support. Principles and guidance for prehabilitation within the management and  
662 support of people with cancer. England: Macmillan Cancer Support  
663 [https://cdn.macmillan.org.uk/dfsmedia/1a6f23537f7f4519bb0cf14c45b2a629/1532-  
665 source/prehabilitation-for-people-with-cancer-tcm9-353994](https://cdn.macmillan.org.uk/dfsmedia/1a6f23537f7f4519bb0cf14c45b2a629/1532-<br/>664 source/prehabilitation-for-people-with-cancer-tcm9-353994)
- 666 16. Greenhalgh T, Papoutsis C. Studying complexity in health services research: desperately seeking an  
667 overdue paradigm shift. *BMC medicine*. 2018 Dec;16(1):1-6. [https://doi.org/10.1186/s12916-018-1089-  
669 4](https://doi.org/10.1186/s12916-018-1089-<br/>668 4) [pmid:29921272](https://pubmed.ncbi.nlm.nih.gov/29921272/)
- 670 17. Murdoch J, Varley A, McCulloch J, Jones M, Thomas LB, Clark A, Stirling S, Turner D, Swart AM, Dresser  
671 K, Howard G. Implementing supportive exercise interventions in the colorectal cancer care pathway: a  
672 process evaluation of the PREPARE-ABC randomised controlled trial. *BMC cancer*. 2021 Dec;21(1):1-2.  
673 <https://doi.org/10.1186/s12885-021-08880-8>
- 674 18. Sandelowski M. Whatever happened to qualitative description?. *Research in nursing & health*. 2000 Aug;  
23(4):334-40.
19. Sekhon, M., Cartwright, M. and Francis, J.J. (2017) Acceptability of healthcare interventions: an overview  
of reviews and development of a theoretical framework. *BMC Health Services Research*, 17(88), 1-13.  
<https://doi.org/10.1186/s12913-017-2031-8>

- 675 20. May, C.R., Mair, F., Finch, T., MacFarlane, A., Dowrick, C., Treweek, S., Rapley, T., Ballini, L., Ong, B.N.,  
676 Rogers, A. and Murray, E. Development of a theory of implementation and integration: Normalization  
677 Process Theory. *Implementation Science*, 2009; 4(1), 1-9. <https://doi.org/10.1186/1748-5908-4-29>
- 678 21. Ritchie, J. and Spencer, L. Qualitative Data Analysis for Applied Policy Research. In: Bryman, A. and  
679 Burgess, R., Eds., *Anal. Qual. Data*, Routledge, London, 1994; 173-194.  
680 [https://doi.org/10.4324/9780203413081\\_chapter\\_9](https://doi.org/10.4324/9780203413081_chapter_9)
- 681 22. Daun JT, Twomey R, Dort JC, Capozzi LC, Crump T, Francis GJ, Matthews TW, Chandarana SP, Hart RD,  
682 Schrag C, Matthews J. A Qualitative Study of Patient and Healthcare Provider Perspectives on Building  
683 Multiphasic Exercise Prehabilitation into the Surgical Care Pathway for Head and Neck Cancer. *Current*  
684 *Oncology*. 2022 Aug; 29(8):5942-54. <https://doi.org/10.3390/curroncol29080469>
- 685 23. Dewberry LC, Wingrove LJ, Marsh MD, Glode AE, Schefter TE, Leong S, Purcell WT, McCarter MD. Pilot  
686 prehabilitation program for patients with esophageal cancer during neoadjuvant therapy and surgery.  
687 *Journal of Surgical Research*. 2019 Mar 1;235:66-72. <https://doi.org/10.1016/j.jss.2018.09.060>
- 688 24. Tweed TT, Sier MA, Van Bodegraven AA, Van Nie NC, Sipers WM, Boerma EJ, Stoot JH. Feasibility and  
689 Efficiency of the BFORE (Better Exercise and Food, Better Recovery) Prehabilitation Program. *Nutrients*.  
690 2021 Oct 2;13(10):3493. <https://doi.org/10.3390/nu13103493>
- 691 25. Tang CY, Turczyniak M, Sayner A, Haines K, Butzkueven S, O'Connell HE. Adopting a collaborative  
692 approach in developing a prehabilitation program for patients with prostate cancer utilising experience-  
693 based co-design methodology. *Supportive Care in Cancer*. 2020 Nov;28(11):5195-202.  
694 <https://doi.org/10.1007/s00520-020-05341-z>
- 695 26. Provan D, McLean G, Moug SJ, Phillips I, Anderson AS. Prehabilitation services for people diagnosed with  
696 cancer in Scotland—Current practice, barriers and challenges to implementation. *The Surgeon*. 2021 Sep  
697 15. <https://doi.org/10.1016/j.surge.2021.08.005>
- 698 27. Faithfull S, Turner L, Poole K, et al. Prehabilitation for adults diagnosed with cancer: a systematic review  
699 of long-term physical function, nutrition and patient-reported outcomes. *Eur J Canc Care* 2019 Jul; 28(4).
- 700 28. Ricketts WM, Bollard K, Streets E, Hutton K, Hornby C, Lau K. Feasibility of setting up a pre-operative  
701 optimisation 'pre-hab' service for lung cancer surgery in the UK. *Perioperative Medicine*. 2020 Dec;  
702 9(1):1-9. <https://doi.org/10.1186/s13741-020-00145-5>
- 703 29. Brahmer JR, Lacchetti C, Schneider BJ, Atkins MB, Brassil KJ, Caterino JM, Chau I, Ernstoff MS, Gardner  
704 JM, Ginex P, Hallmeyer S. Management of immune-related adverse events in patients treated with  
705 immune checkpoint inhibitor therapy: American Society of Clinical Oncology Clinical Practice Guideline.  
706 *Journal of clinical oncology: official journal of the American Society of Clinical Oncology*. 2018 Jun 10;  
707 36(17):1714.
- 708 30. Bradley P, Merchant Z, Rowlinson-Groves K, Taylor M, Moore J, Evison M. Feasibility and outcomes of a  
709 real-world regional lung cancer prehabilitation programme in the UK. *British Journal of Anaesthesia*.  
710 2022 Jul 13. <https://doi.org/10.1016/j.bja.2022.05.034>
- 711 31. Bryson JM, Crosby BC, Stone MM. Designing and implementing cross-sector collaborations: Needed and  
712 challenging. *Public administration review*. 2015 Sep;75(5):647-63. <https://doi.org/10.1111/puar.12432>
- 713 32. Yardley L, Morrison L, Bradbury K, Muller I. The person-based approach to intervention development:  
714 application to digital health-related behavior change interventions. *Journal of medical Internet*  
715 *research*. 2015 Jan 30;17(1):e4055. <https://doi.org/10.2196/jmir.4055>
- 716 33. Skivington K, Matthews L, Simpson SA, Craig P, Baird J, Blazeby JM, Boyd KA, Craig N, French DP,  
717 McIntosh E, Petticrew M. A new framework for developing and evaluating complex interventions:  
718 update of Medical Research Council guidance. *bmj*. 2021 Sep 30;374.  
719 <http://dx.doi.org/10.1136/bmj.n2061>
- 720 34. May CR, Albers B, Desveaux L, Finch TL, Gilbert A, Hillis A, Girling M, Kislov R, MacFarlane A, Mair FS,  
721 May CM. Translational framework for implementation evaluation and research: Protocol for a  
722 qualitative systematic review of studies informed by Normalization Process Theory (NPT)[version 1; peer  
723 review: 2 approved]. *NIHR open research*. 2022 Jun 13;2:41.  
724 <https://doi.org/10.3310/nihropenres.13269.1>
- 725 35. Moore GF, Audrey S, Barker M, Bond L, Bonell C, Hardeman W, Moore L, O'Cathain A, Tinati T, Wight D,  
726 Baird J. Process evaluation of complex interventions: Medical Research Council guidance. *bmj*. 2015 Mar  
727 19;350. <https://doi.org/10.1136/bmj.h1258>
- 728 36. Toomey E, Hardeman W, Hankonen N, Byrne M, McSharry J, Matvienko-Sikar K, Lorencatto F. Focusing  
729 on fidelity: narrative review and recommendations for improving intervention fidelity within trials of  
730 health behaviour change interventions. *Health Psychology and Behavioral Medicine*. 2020 Jan  
731 1;8(1):132-51. <https://doi.org/10.1080/21642850.2020.1738935>
- 732 37. Horner SD. Best practices for improving intervention fidelity that every nurse should know. *Journal for*  
733 *Specialists in Pediatric Nursing*. 2012 Apr;17(2):171.

- 734 38. Tew GA, Bedford R, Carr E, Durrand JW, Gray J, Hackett R, Lloyd S, Peacock S, Taylor S, Yates D, Danjoux  
735 G. Community-based prehabilitation before elective major surgery: the PREP-WELL quality improvement  
736 project. *BMJ open quality*. 2020 Mar 1;9(1):e000898. <https://doi.org/10.1136/bmjog-2019-000898>



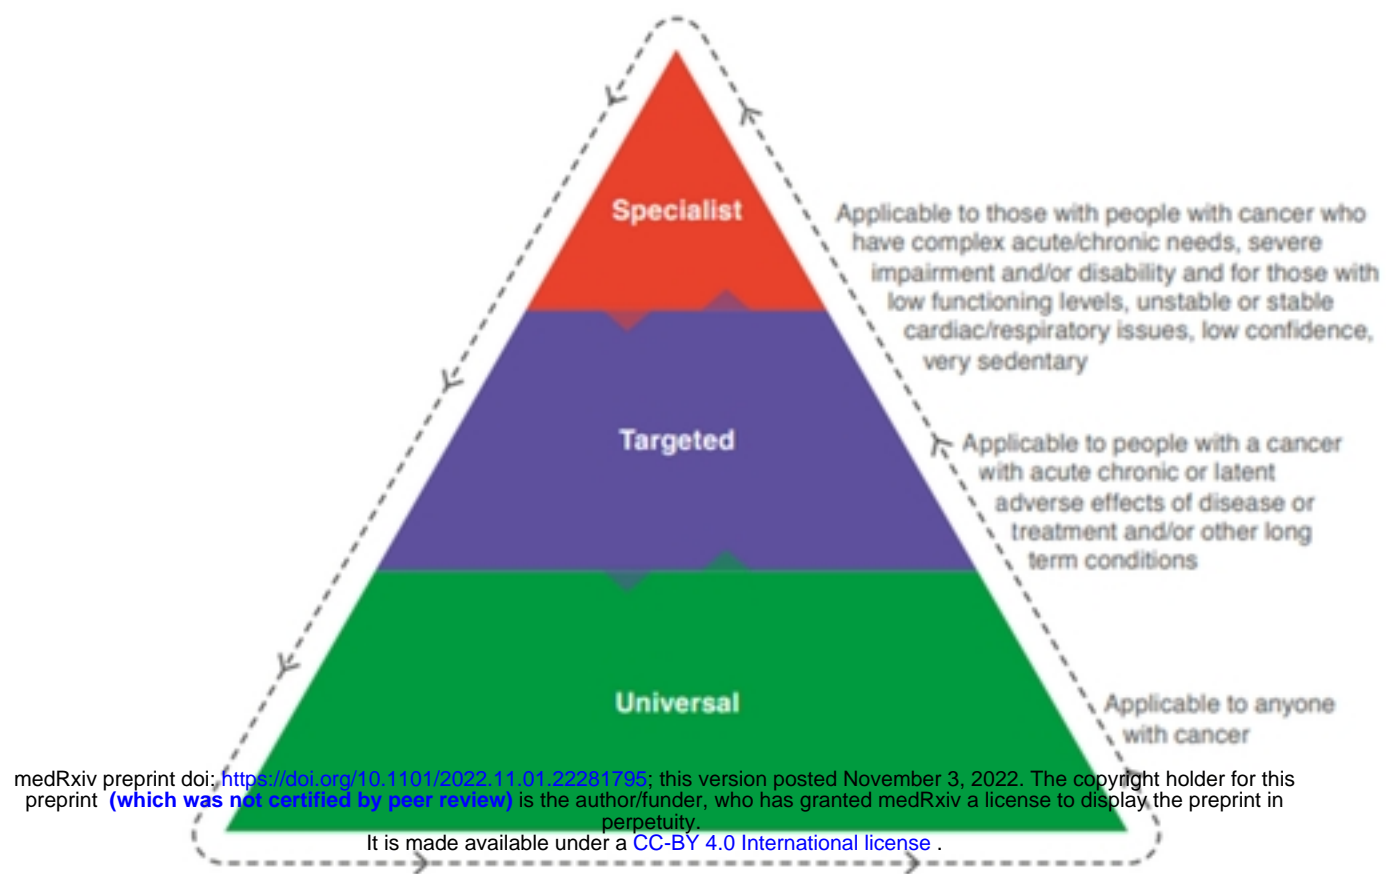

Figure 1
